# Supplementary material
Source: Frontiers journal article supplement (https://www.frontiersin.org/articles/500831)
Supplement: Data_Sheet_1.PDF [file Data_Sheet_1.PDF]

## Supplemental Results

### *Normalized strength outcomes*

The adjusted effect for the 1RM<sub>BENCH</sub> changes was negligible (0), and its compatibility interval did not reveal estimates that were especially favorable in either direction (Table S1). For the 1RM<sub>LEGPRESS</sub>, 2 subjects (1 in each group) progressed to the point that their post-study 1RM exceeded the limits of the leg press apparatus; thus, results on this outcome were analyzed from 12 subjects in TRAD and 13 subjects in ISO. The adjusted effect for the 1RM<sub>LEGPRESS</sub> changes favored TRAD (by 0.36 bodyweights), with CI estimates ranging from a 0.03 bodyweights benefit for the ISO group to a 0.86 bodyweights benefit for the TRAD group (Table S1).

***Table S1. Normalized strength outcomes***

|                             | TRAD      |           |           | ISO       |           |           | Between-group      |
|-----------------------------|-----------|-----------|-----------|-----------|-----------|-----------|--------------------|
|                             | Pre       | Post      | Delta     | Pre       | Post      | Delta     | Estimate (90% CI)  |
| <b>1RM Bench press (BW)</b> | 1.1 ± 0.2 | 1.2 ± 0.2 | 0.1 ± 0.1 | 1.1 ± 0.2 | 1.2 ± 0.2 | 0.1 ± 0.1 | 0 (−0.05, 0.05)    |
| <b>1RM Leg press (BW)</b>   | 3.8 ± 1.0 | 5.1 ± 0.9 | 1.3 ± 0.8 | 4.0 ± 0.6 | 4.9 ± 0.8 | 0.9 ± 0.5 | 0.36 (−0.86, 0.03) |

1RM = one repetition maximum; TRAD = group performing resistance training with passive inter-set rest; ISO = group performing resistance training with 30-second isometric actions during the inter-set rest period; CI = compatibility intervals; BW = bodyweight

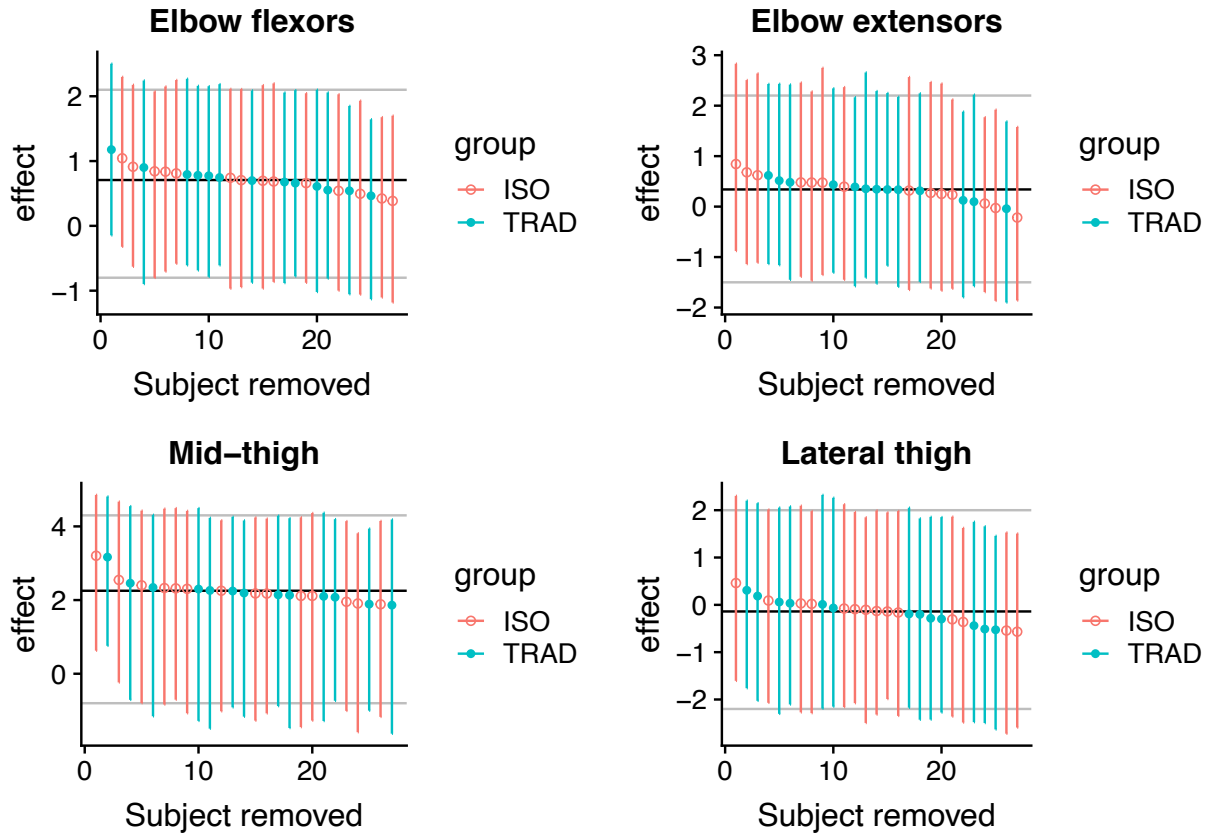

**Figure S1.** Leave-one-out sensitivity analyses for muscle thickness outcomes. All effects are presented in millimeters of muscle thickness. Black horizontal lines indicate the study-wide effect and grey lines indicate the study-wide 90% CI. Note subjects #1 and #2 drastically affect the estimates and CI's for mid-thigh muscle thickness. CI = compatibility interval.

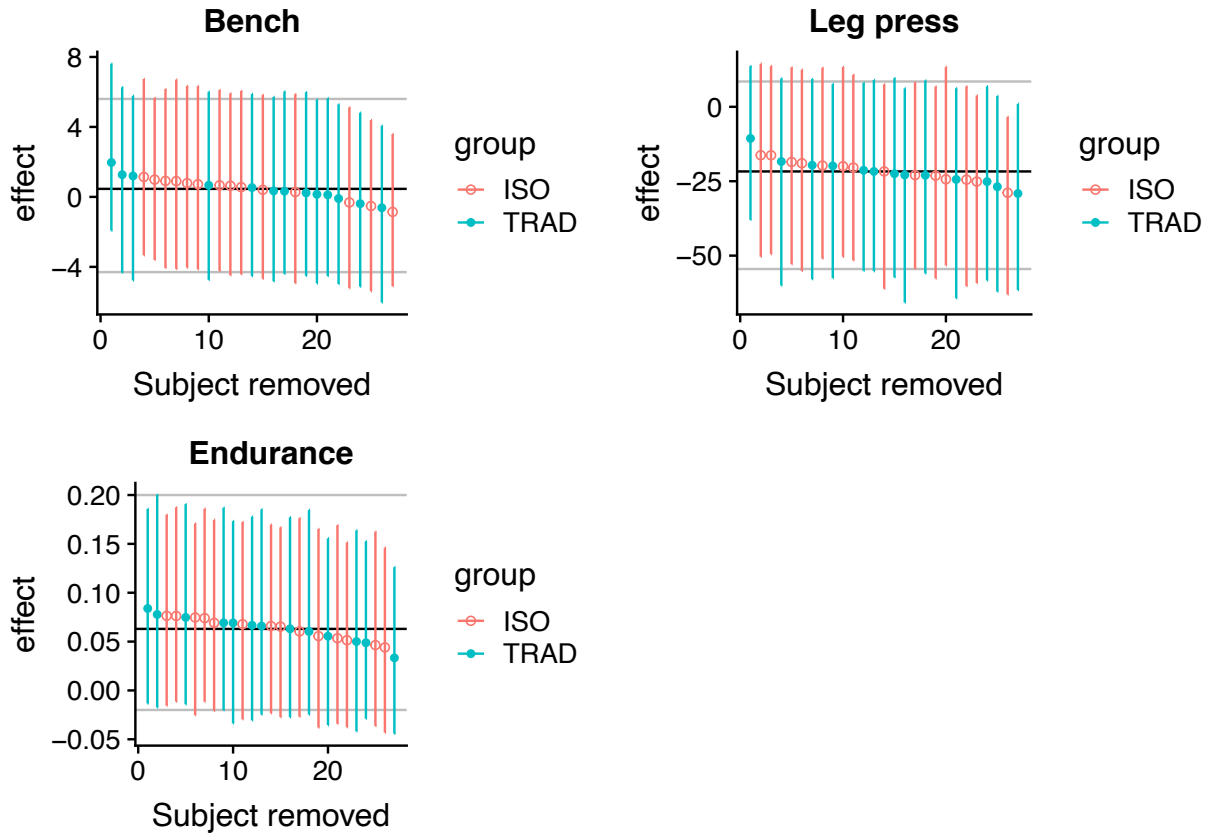

**Figure S2.** Leave-one-out sensitivity analyses for strength and endurance outcomes. Bench and leg press outcomes are presented as kilograms from the one-repetition maximum test. Endurance is presented as  $\ln(\text{repetitions})$ . Black horizontal lines indicate the study-wide effect and grey lines indicate the study-wide 90% CI. Note that subject #1 in the leg press has a marked effect on the study-wide outcome. CI = compatibility interval.
